# Supplementary material
Source: PubMed Central journal article supplement (PMC4834334)

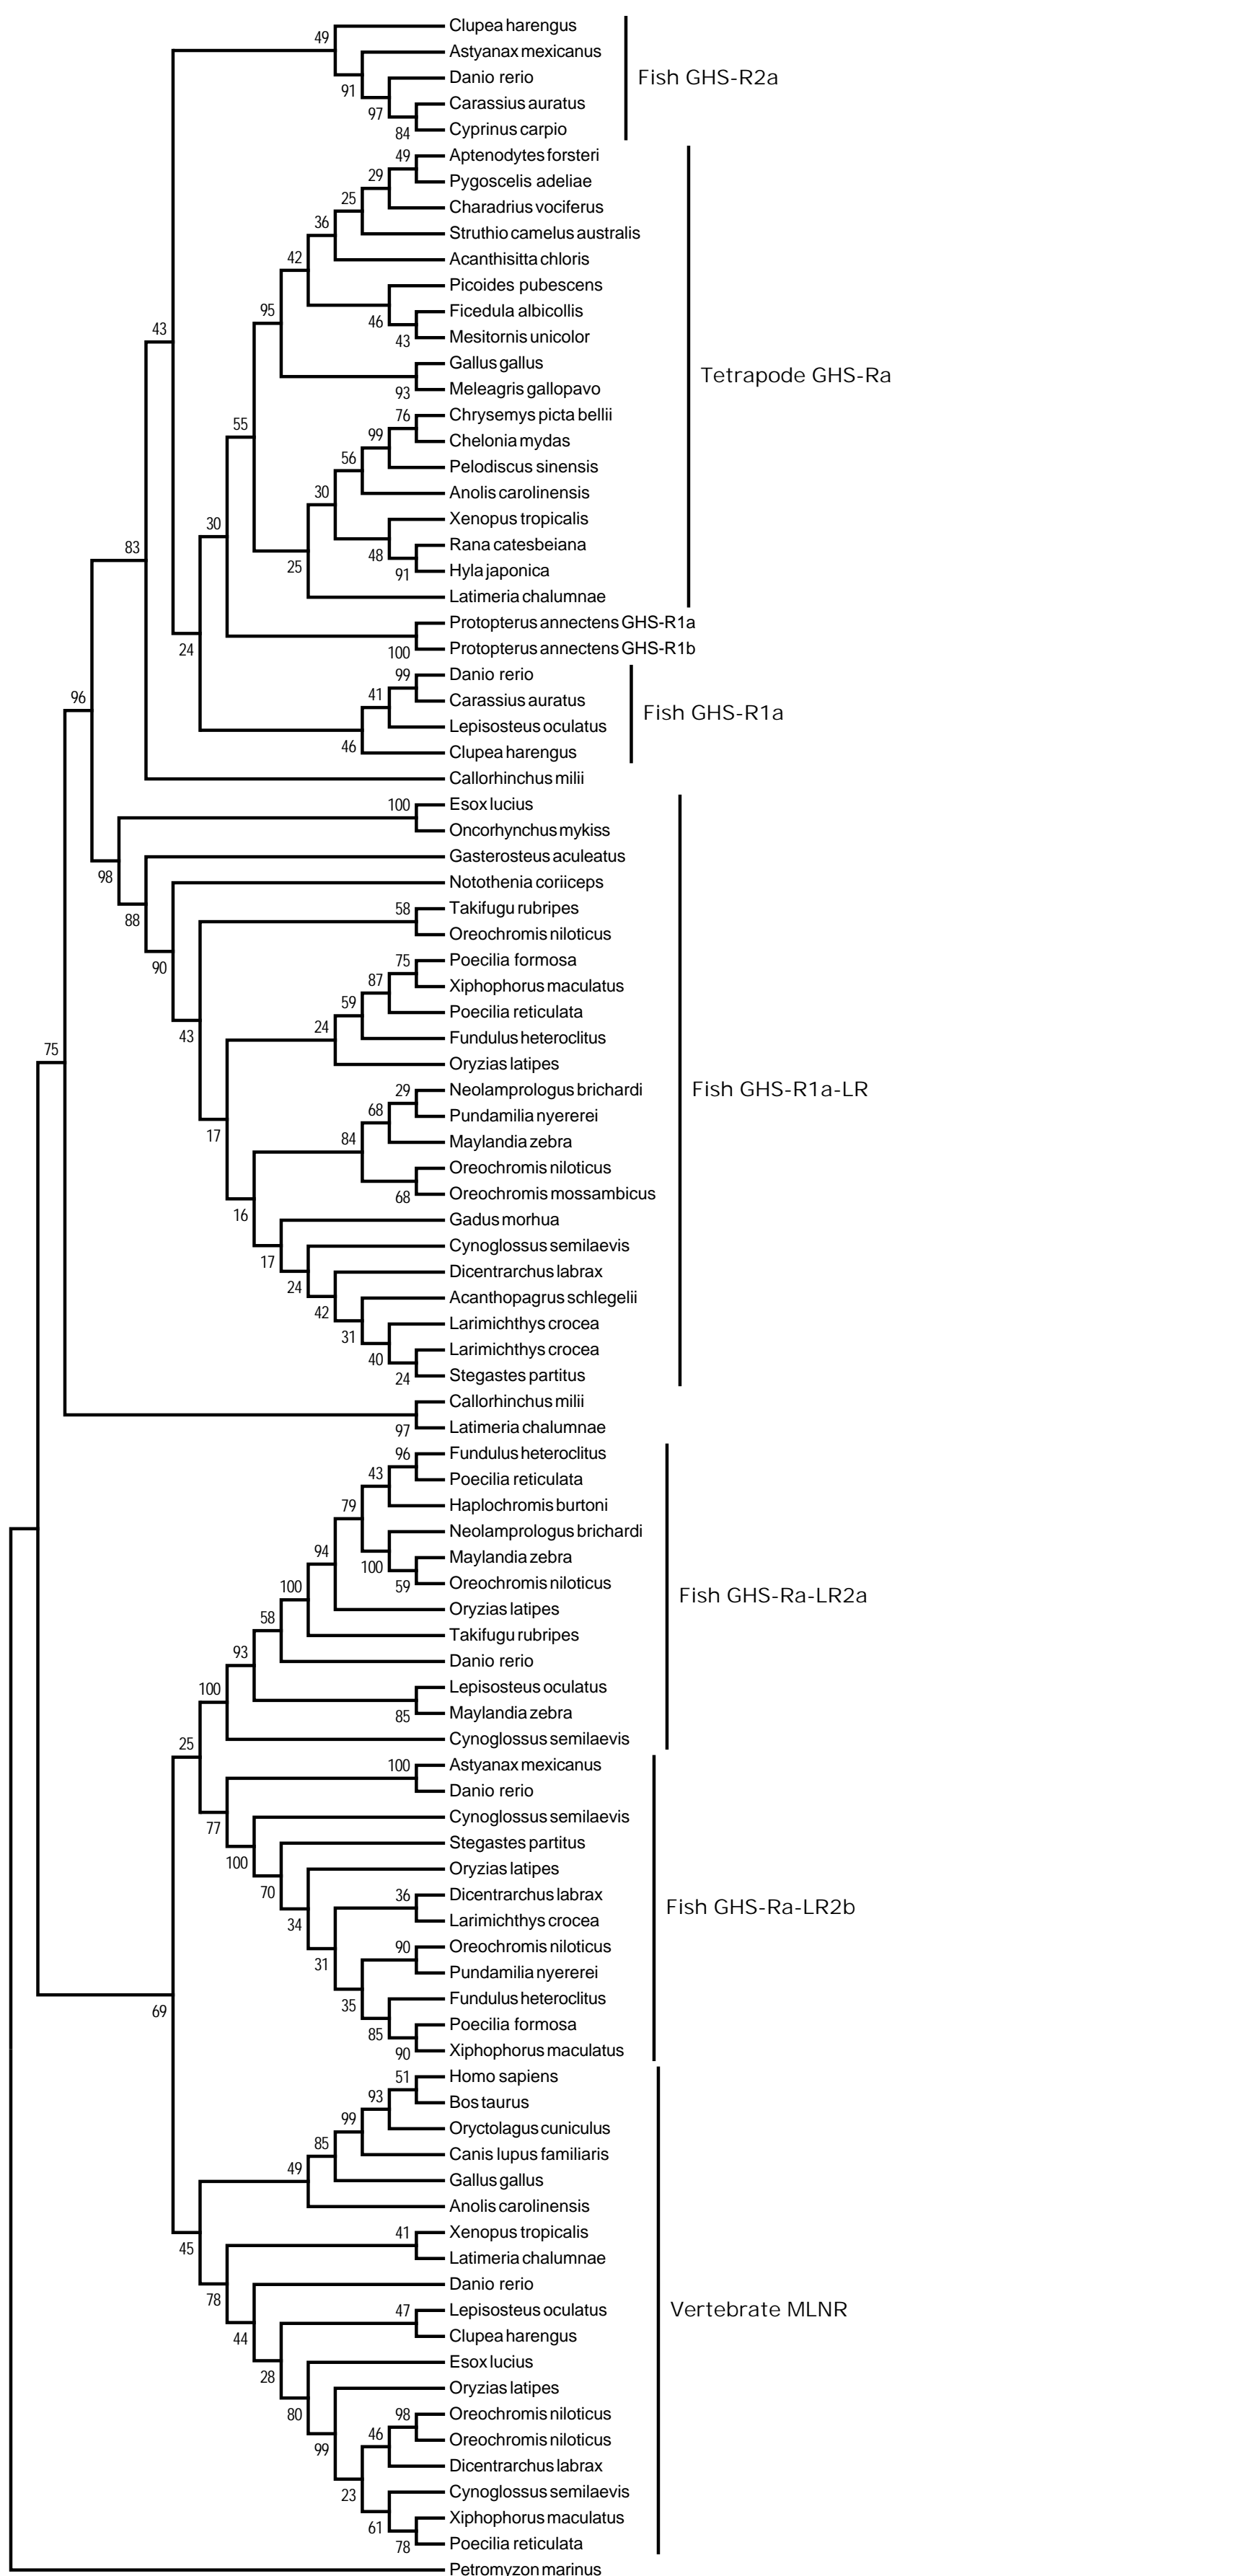

Supplement: ECE3-6-2516-s006.pdf [file ECE3-6-2516-s006.pdf]
